# Supplementary material for: Highly efficient reduction of 4-nitrophenolate to 4-aminophenolate by Au/γ-Fe2O3@HAP magnetic composites
Source: Royal Society of Chemistry journal article supplement (doi:10.1039/c9ra00345b), 2019-01-01
Supplement: c9ra00345b1.pdf [file c9ra00345b1.pdf]

# High efficient reduction of 4-nitrophenolate to 4-aminophenolate by Au/ $\gamma$ -Fe<sub>2</sub>O<sub>3</sub>@HAP magnetic composites

Yide Xia, Ying Liu \*, Nannan Shi, Xungao Zhang \*

\*Corresponding authors: liuying69@whu.edu.cn (Y Liu),  
xgzhang66@whu.edu.cn (X. Zhang)

College of Chemistry and Molecular Sciences, Wuhan University, Wuhan  
430072, Hubei, China

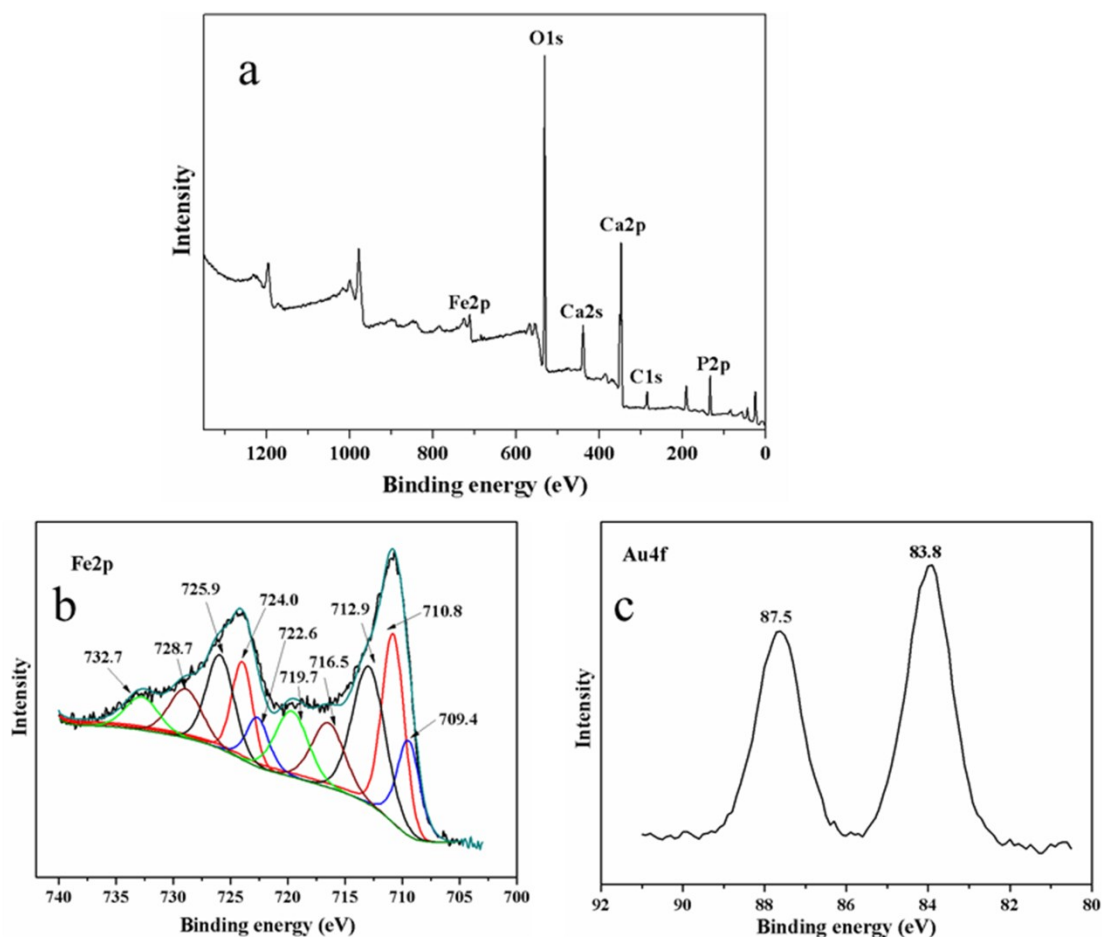

**Fig. S1.** (a) XPS survey spectrum, high resolution spectra of (b) Fe 2p and (c) Au 4f of Au/ $\gamma$ -Fe<sub>2</sub>O<sub>3</sub>@HAP-2 after the catalytic test.
